# Supplementary material for: Annexin A2 could enhance multidrug resistance by regulating NF-κB signaling pathway in pediatric neuroblastoma
Source: PubMed Central journal article supplement (PMC5559827; doi:10.1186/s13046-017-0581-6), 2017-08-16
Supplement: 13046_2017_581_MOESM1_ESM.pdf [file 13046_2017_581_MOESM1_ESM.pdf]

Figure S1

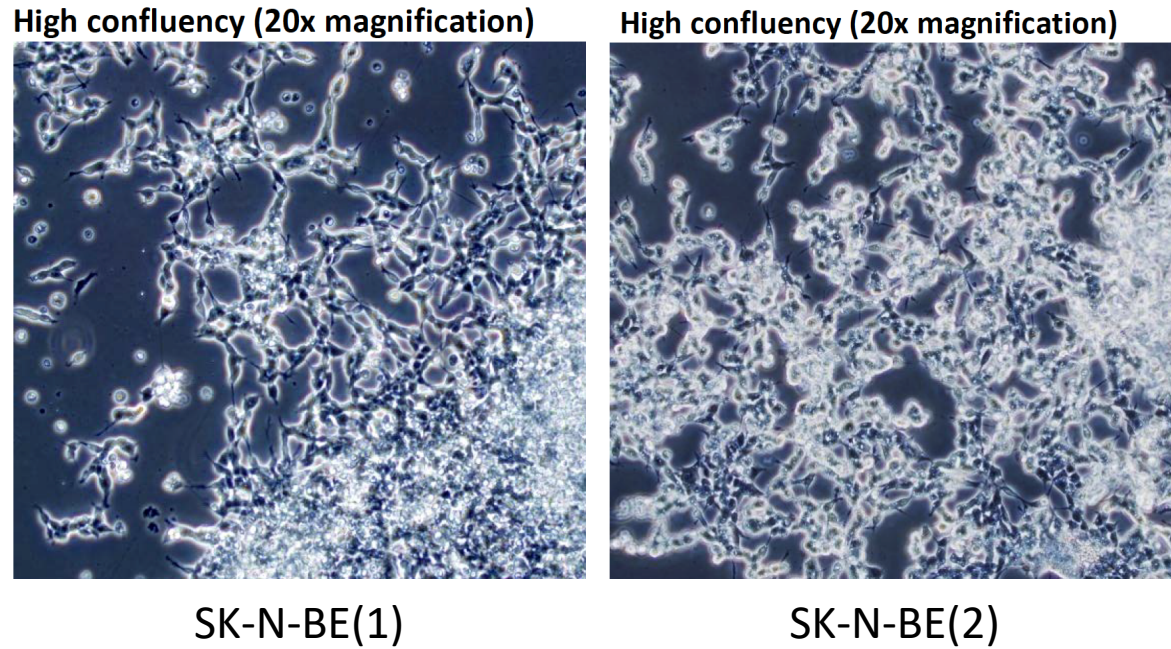

IC90 for SK-N-BE(1) cell line

| <u>CBDCA (<math>\mu\text{g/ml}</math>)</u> | <u>CDDP (<math>\mu\text{g/ml}</math>)</u> | <u>DOX (ng/ml)</u> | <u>ETOP (ng/ml)</u> | <u>L-PAM (<math>\mu\text{g/ml}</math>)</u> |
|--------------------------------------------|-------------------------------------------|--------------------|---------------------|--------------------------------------------|
| 0.2                                        | <0.1                                      | <0.1               | 158                 | 0.8                                        |

CBDCA, carboplatin; CDDP, cisplatin; DOX, doxorubicin; ETOP, etoposide; L-PAM, melphalan

IC90 for SK-N-BE(2) cell line

| <u>CBDCA (<math>\mu\text{g/ml}</math>)</u> | <u>CDDP (<math>\mu\text{g/ml}</math>)</u> | <u>DOX (ng/ml)</u> | <u>ETOP (ng/ml)</u> | <u>L-PAM (<math>\mu\text{g/ml}</math>)</u> |
|--------------------------------------------|-------------------------------------------|--------------------|---------------------|--------------------------------------------|
| 2.1                                        | 0.2                                       | 92.3               | 1130                | 24                                         |

CBDCA, carboplatin; CDDP, cisplatin; DOX, doxorubicin; ETOP, etoposide; L-PAM, melphalan
