# Supplementary material for: Annexin A2 could enhance multidrug resistance by regulating NF-κB signaling pathway in pediatric neuroblastoma
Source: Springer Nature journal article supplement (doi:10.1186/s13046-017-0581-6), 2017-08-16

Figure S2

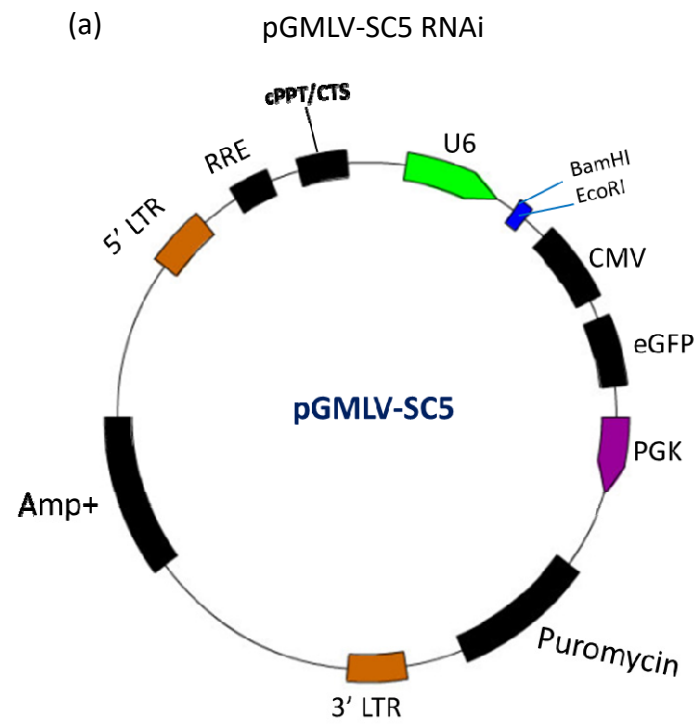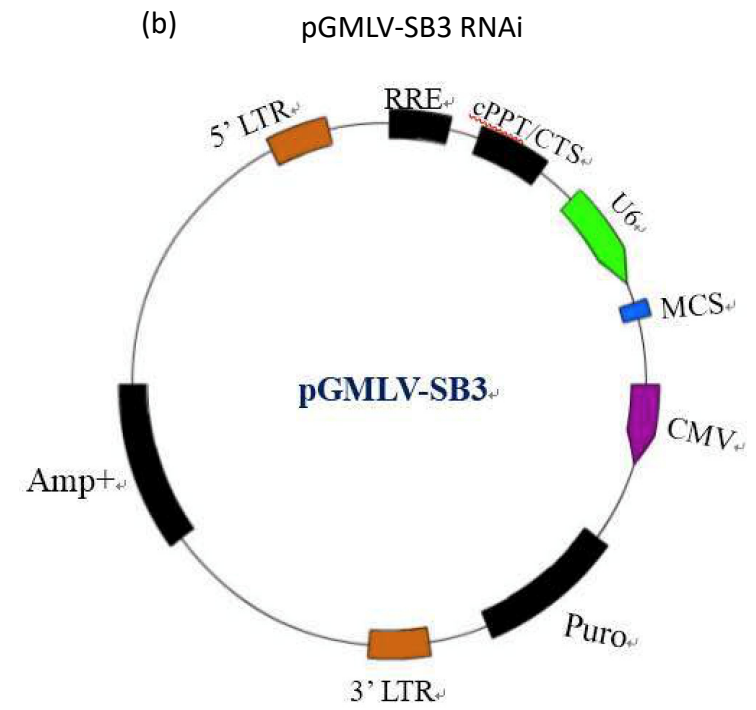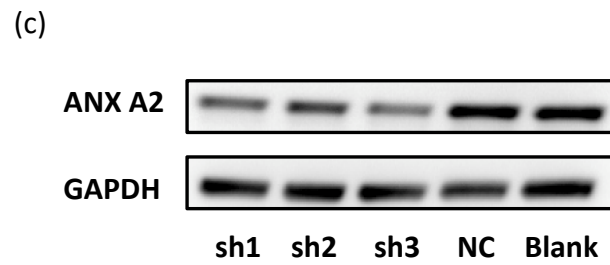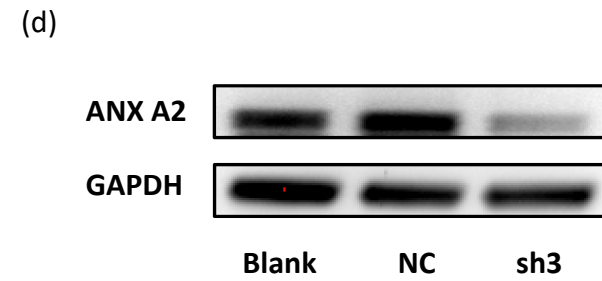

Supplement: MOESM2 [file 14220146]
