# Supplementary material for: Annexin A2 could enhance multidrug resistance by regulating NF-κB signaling pathway in pediatric neuroblastoma
Source: Springer Nature journal article supplement (doi:10.1186/s13046-017-0581-6), 2017-08-16

Figure S3

(a) sh-1:

Top 5'-GATCCGGAGTGAAGAGGAAAGGAACTTTCAAGAGAAGTTCCTTTCCTCTTCACTCCTTTTTTG',

Bottom 5'-

AATTCAAAAAGGAGTGAAGAGGAAAGGAACTTCTCTTGAAAGTTCCTTTCCTCTTCACTCCg';

sh-2:

Top

5'-GATCCGCATCAGGAAAGAGGTTAAAGTTCAAGAGACTTTAACCTCTTTCCTGATGCTTTTTTG.

Bottom

5'-AATTCAAAAAGCATCAGGAAAGAGGTTAAAGTCTCTTGAACCTTTAACCTCTTTCCTGATGCG-3';

sh-3:

Top 5'-GATCCGCGGGATGCTTTGAACATTGAACTCGAGTTCAATGTTCAAAGCATCCCGTTTTTT

Bottom

5'-AATTA AAAACGGGATGCTTTGAACATTGAACTCGAGTTCAATGTTCAAAGCATCCCGCG -3'.

(b)

IC 50 value of Doxorubicin for SK-N-BE(2)

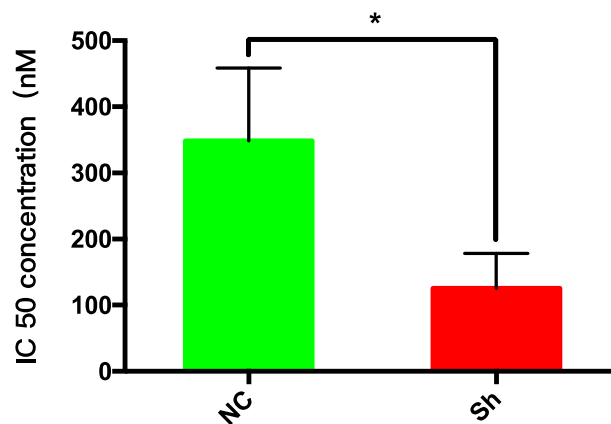

(c)

IC 50 value of Etoposide for SK-N-BE(2)

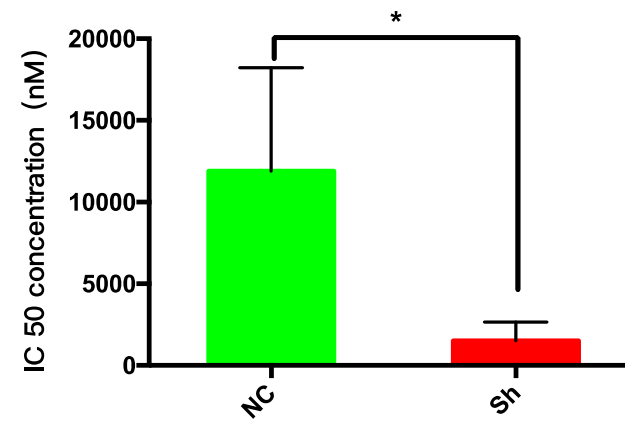

Supplement: MOESM3 [file 14220146]
