# Supplementary material for: Annexin A2 could enhance multidrug resistance by regulating NF-κB signaling pathway in pediatric neuroblastoma
Source: Springer Nature journal article supplement (doi:10.1186/s13046-017-0581-6), 2017-08-16

Figure S4

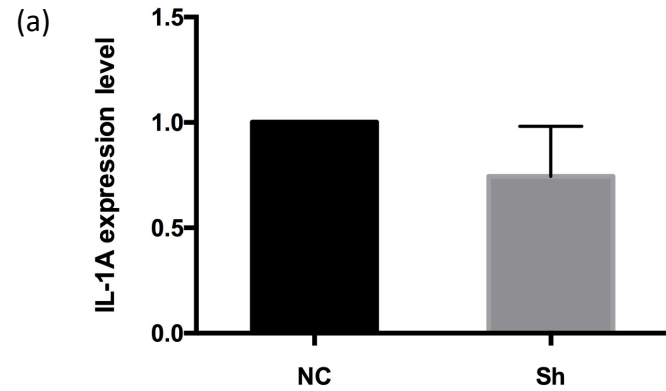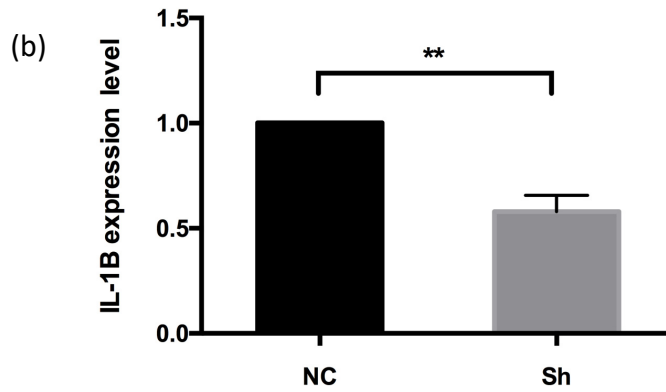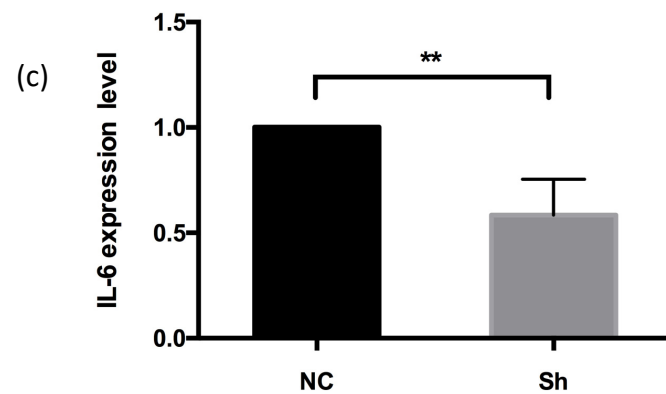

(d) **PCR primer**  
**IL-1A:**  
**Forward:** CCTCACCTCCAACAAAGAT  
**Reverse:** GCCTCAGACATCTCCAGTCC

**IL-1B:**  
**Forward:** TACAGCAAGGGCTTCAGG  
**Reverse:** TCGTACAGGTGCATCGTG

**IL-6:**  
**Forward:** CCTCACCTCCAACAAAGAT  
**Reverse:** GCCTCAGACATCTCCAGTCC

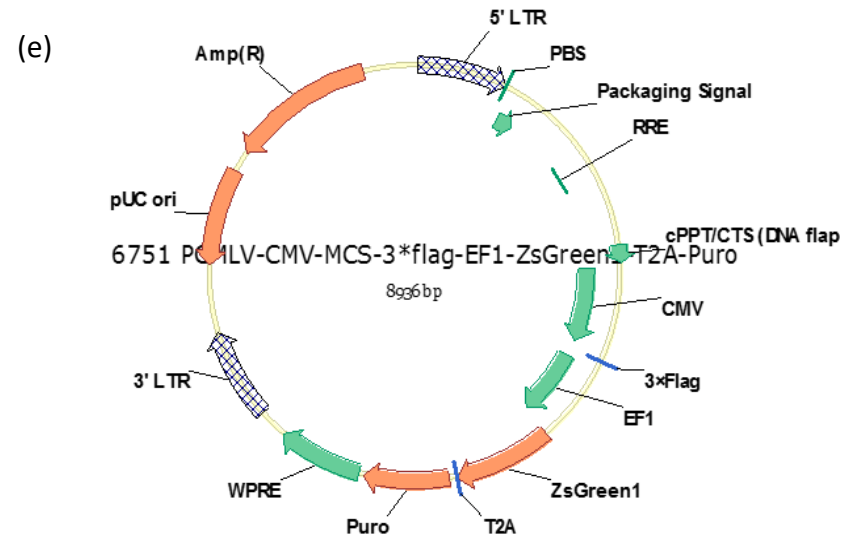

Supplement: MOESM4 [file 14220146]
